# Supplementary material for: A modified MXene composite sensor with sulphur impurities for electrochemical detection of lead in the aqueous system
Source: Royal Society of Chemistry journal article supplement (doi:10.1039/d4nr05021e), 2025-01-01
Supplement: d4nr05021e1.pdf [file d4nr05021e1.pdf]

## Supplementary Information

### Modified MXene Composite Sensor with Sulphur Impurities for Electrochemical Detection of Lead in Aqueous System

*Km Sapna*,<sup>1,2</sup>, *Vartika Sharma*<sup>2,3</sup>, *Manoj Kumar*<sup>1#</sup>, *Vaibhav Kulshrestha*<sup>2,3\*</sup>

<sup>1</sup>Department of Physics, Malaviya National Institute of Technology, JLN Marg, Jaipur-302017,  
Rajasthan, India

<sup>2</sup>CSIR-Central Salt & Marine Chemicals Research Institute, Gijubhai Badheka Marg,  
Bhavnagar-364002, Gujarat, India

<sup>3</sup>Academy of Scientific and Innovative Research (AcSIR), Uttar Pradesh-201002, India

*Email:* [vaibhavk@csmcri.res.in](mailto:vaibhavk@csmcri.res.in)\*, [mkumar.phy@mnit.ac.in](mailto:mkumar.phy@mnit.ac.in)#

#### SI-1: Fabrication of Plastic Chip Electrode (PCE)

Firstly, a thick solution of PMMA was made by dissolving it in chloroform. Graphite powder was then added to the PMMA solution, forming a viscous mixture, which was subjected to ultrasonication for 15 minutes to ensure uniform dispersion and optimal consistency. This PMMA-graphite suspension was poured into a custom glass mold and allowed to stand at room temperature for 24 hours to enable complete chloroform evaporation. The resulting PCE sheets, approximately  $380 \pm 10 \mu\text{m}$  thick, had a resistance of about  $28 \pm 2 \Omega$ . These sheets were then cut into  $1.5 \times 1 \text{ cm}^2$  pieces and laminated manually with a cello tape to fix the exposed surface area, with a circular active area of  $0.28 \text{ cm}^2$  (excluding contact regions), preparing them for subsequent experimental applications.

#### SI-2: Electrochemical active surface area of bare PCE, composite electrodes

CV at different scan rates in 5.0 mM ( $\text{K}_4[\text{Fe}(\text{CN})_6]$ ) solution with 0.1 M KCl were recorded of bare PCE, TiMX/PCE, S-Bi/PCE, and S-Bi@TiMX/PCE, as shown in Figure S1. The electrochemical surface areas of bare PCE, TiMX/PCE, S-Bi/PCE, and S-Bi@TiMX/PCE were calculated using slopes of corresponding calibration plots in Randles-Sevcik equation (Equation S1):

$$I_p = (2.69 \times 10^5) A C n^{3/2} D^{1/2} \nu^{1/2} \quad (\text{i})$$

Where,

$I_p$  corresponds anodic peak current (A),

A corresponds to electrochemical active surface area of electrode ( $\text{cm}^2$ ),

C refers to concentration of ( $\text{mol}/\text{cm}^3$ ),

n denotes number of electrons involved in the redox process ( $n=1$ ),

D stands for diffusion coefficient of analyte ( $\text{Fe}[\text{CN}_6]^{-3/-4}$ ) ( $D = 7.6 \times 10^{-6} \text{ cm}^2/\text{s}$ )

v denotes scan rate (V/s)

The electrochemical active surface areas of PCE, TiMX/PCE, S-Bi/PCE, and S-Bi@TiMX/PCE were calculated to be 0.009, 0.0120, 0.015 and 0.028  $\text{cm}^2$ , respectively.

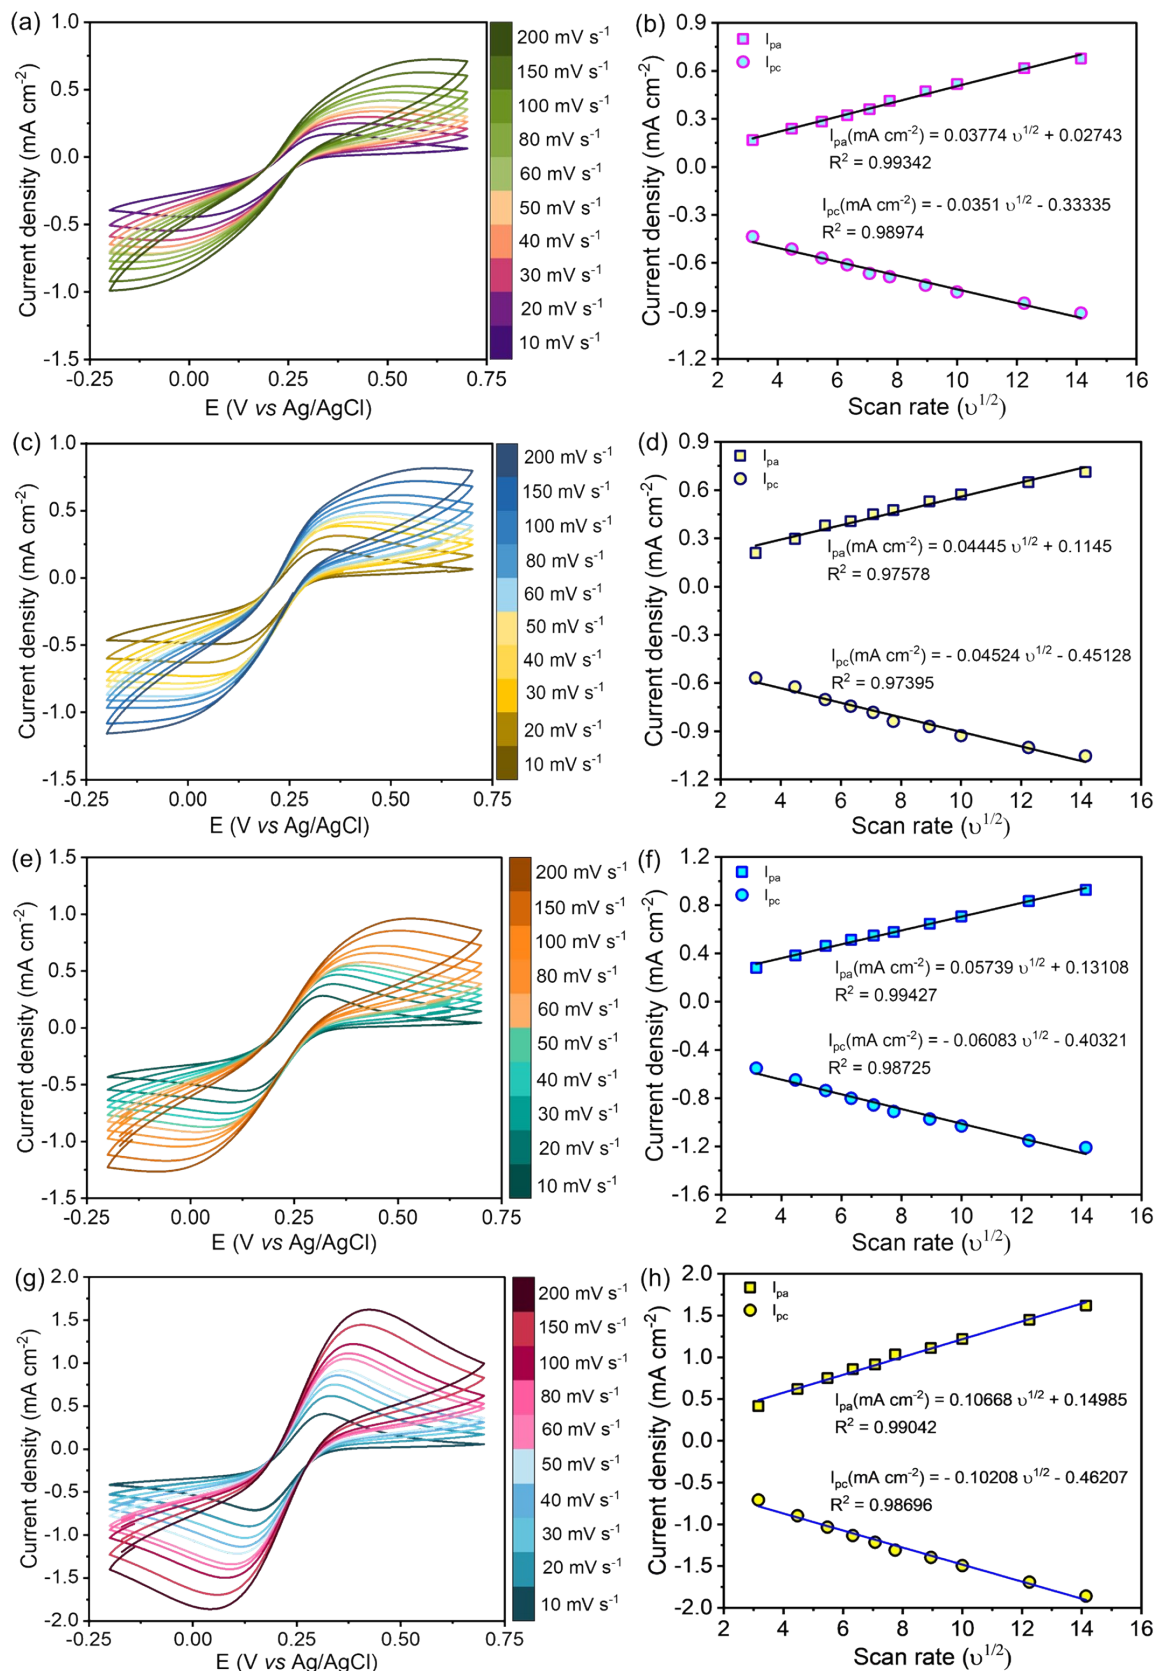

**Figure. S1** (a), (c), (e), and (g) CVs of bare PCE, TiMX/PCE, S-Bi/PCE, and S-Bi@TiMX/PCE at different scan rates in 5.0 mM ( $K_4[Fe(CN)_6]$ ) solution with 0.1 M KCl, and (b), (d), (f), and (h) corresponding linear calibration plots of anodic and cathodic peak current densities.
